# Supplementary material
Source: PubMed Central journal article supplement (PMC3666313)
Supplement: NIHMS458418-supplement-1.pdf [file NIHMS458418-supplement-1.pdf]

## Supplementary Information

### Supplementary Figures

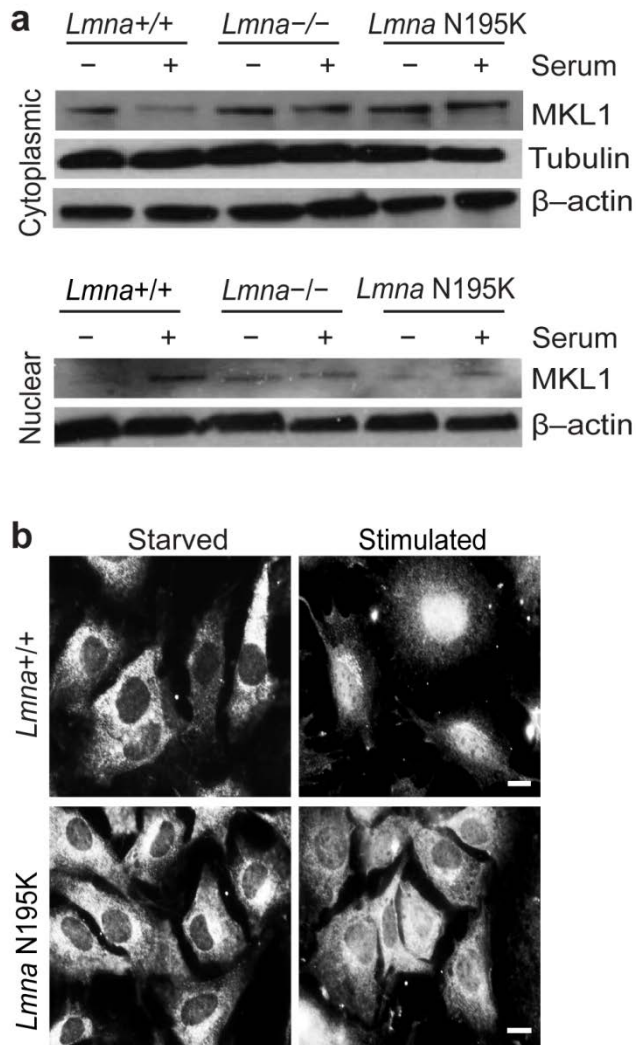

**Supplementary Figure 1. Impaired nuclear translocation of MKL1 in lamin A/C-deficient and *Lmna* N195K mutant cells.** (a) Cytoplasmic and nuclear extracts probed for MKL1 and β-actin and tubulin as loading controls. *Lmna*<sup>+/+</sup> cells show decreased cytoplasmic MKL1 and concomitant increase in nuclear MKL1 in response to serum stimulation, which is absent in *Lmna*<sup>-/-</sup> and *Lmna* N195K cells. (b) Representative images of *Lmna*<sup>+/+</sup> and *Lmna*<sup>N195K/N195K</sup> bone-marrow derived mouse mesenchymal stem cells immunofluorescently labeled for MKL1 before and after serum stimulation. Scale bar, 20 μm.

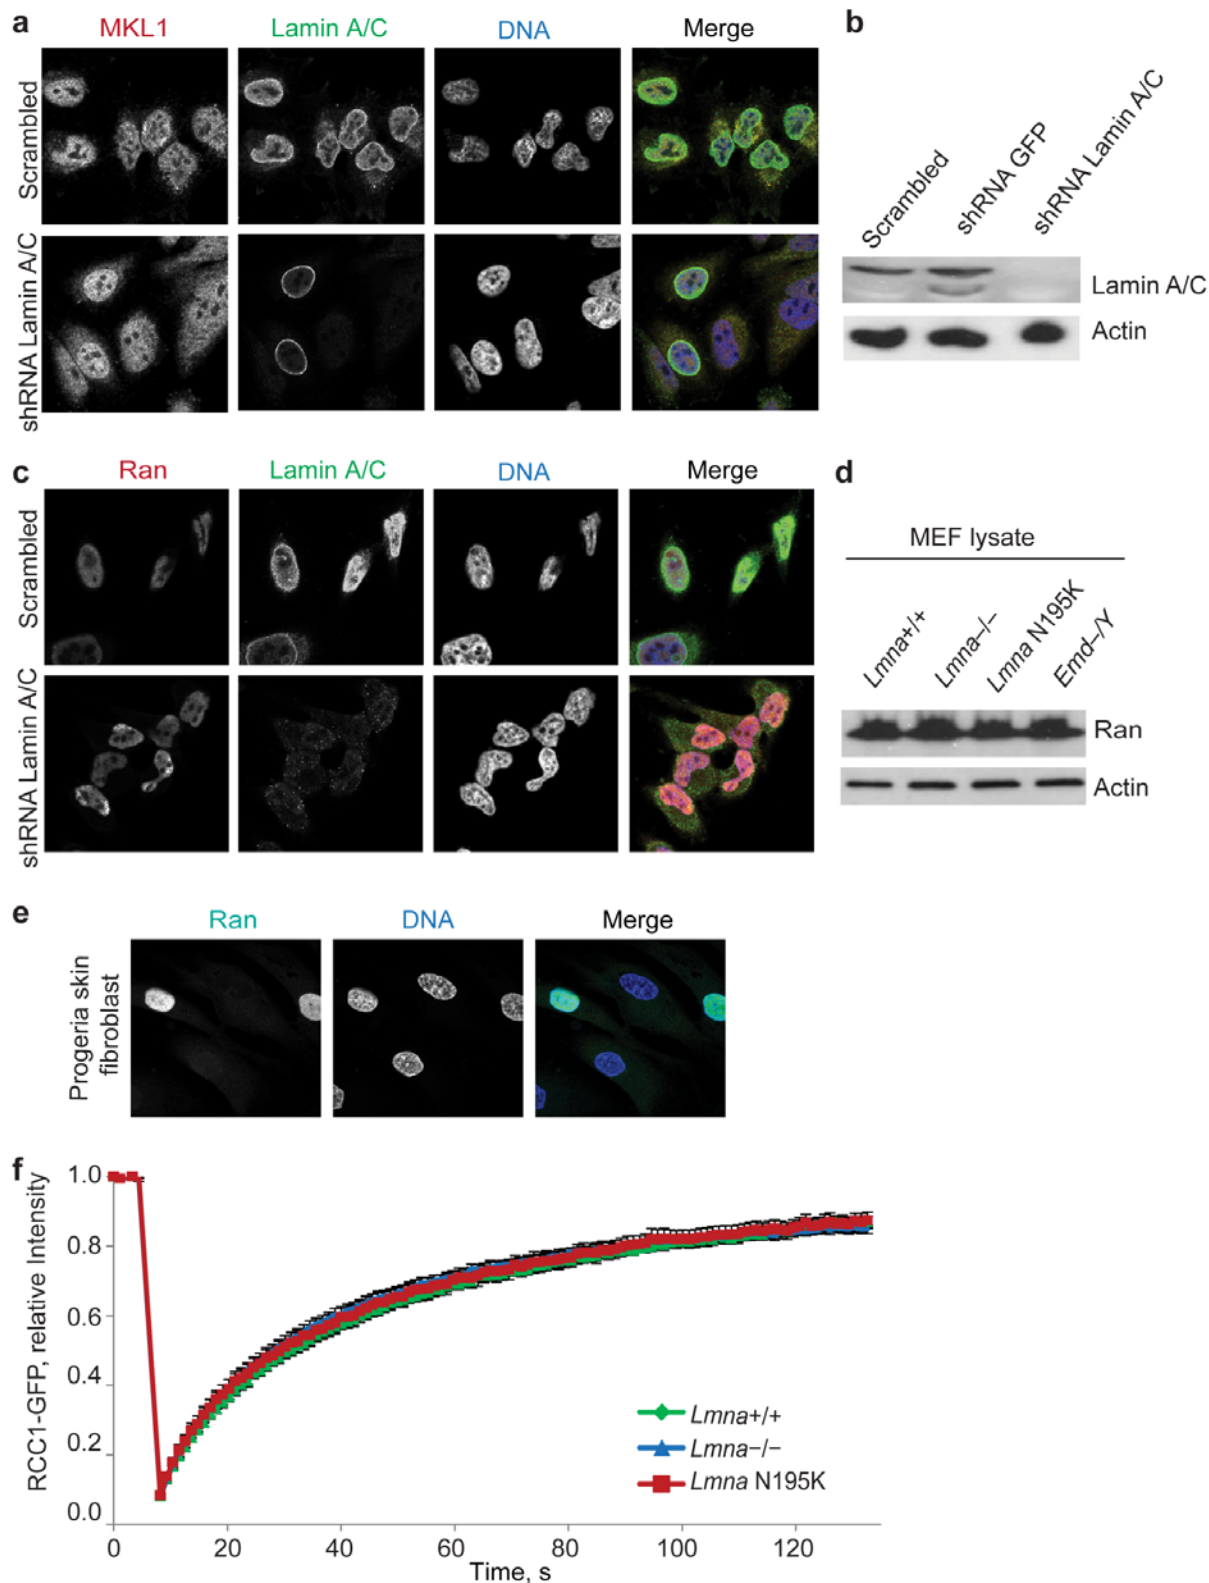

**Supplementary Figure 2. Loss of lamins A/C impairs nuclear translocation of MKL1 but does not affect Ran protein localization and levels.** (a) Representative images of serum-stimulated HeLa cells fluorescently labeled for lamins A/C and MKL1 after shRNA mediated knockdown of lamins A/C or scrambled control. The immunofluorescence images confirm lamin A/C knockdown and reduced nuclear accumulation of MKL1 upon serum stimulation in cells with reduced lamin A/C levels. In the merged images, DNA is shown in blue, lamin A/C in green and MKL1 in red. Scale bar, 10  $\mu$ m. (b) Western blot analysis to confirm down-regulation of

lamin A/C in *Lmna* shRNA-treated HeLa cells and non-targeted controls. (c) Immunofluorescence analysis of lamin A/C and Ran in representative *Lmna* knockdown HeLa cells and non-targeted controls show that Ran localization is normal in these cells. DNA is shown in blue, lamin A/C in green, and Ran in red. Scale bar, 10  $\mu\text{m}$ . (d) Representative Western analysis of Ran levels in *Lmna*<sup>+/+</sup>, *Lmna*<sup>-/-</sup>, *Lmna* N195K, and *Emd*<sup>-/Y</sup> cells. All cell lines had normal levels of Ran protein. (e) Since cells from HGPS patients have defects in the localization of the nuclear transport factor Ran,<sup>1</sup> we used HGPS patient fibroblasts as positive control for disturbed Ran localization. Unlike HGPS cells, however, *Lmna*<sup>-/-</sup> and *Lmna* N195K cells had normal Ran levels and localization. Representative immunofluorescence images showing defective Ran localization in a subpopulation of HGPS patient skin fibroblasts. Ran is shown in green and DNA is shown in blue. Scale bar, 10  $\mu\text{m}$ . (f) Fluorescence recovery after photobleaching (FRAP) analysis of RCC1-GFP confirmed that *Lmna*<sup>-/-</sup> and *Lmna* N195K MEFs had normal mobility of RCC1. *N* = 10 for each cell line. Error bars, s.e.m.

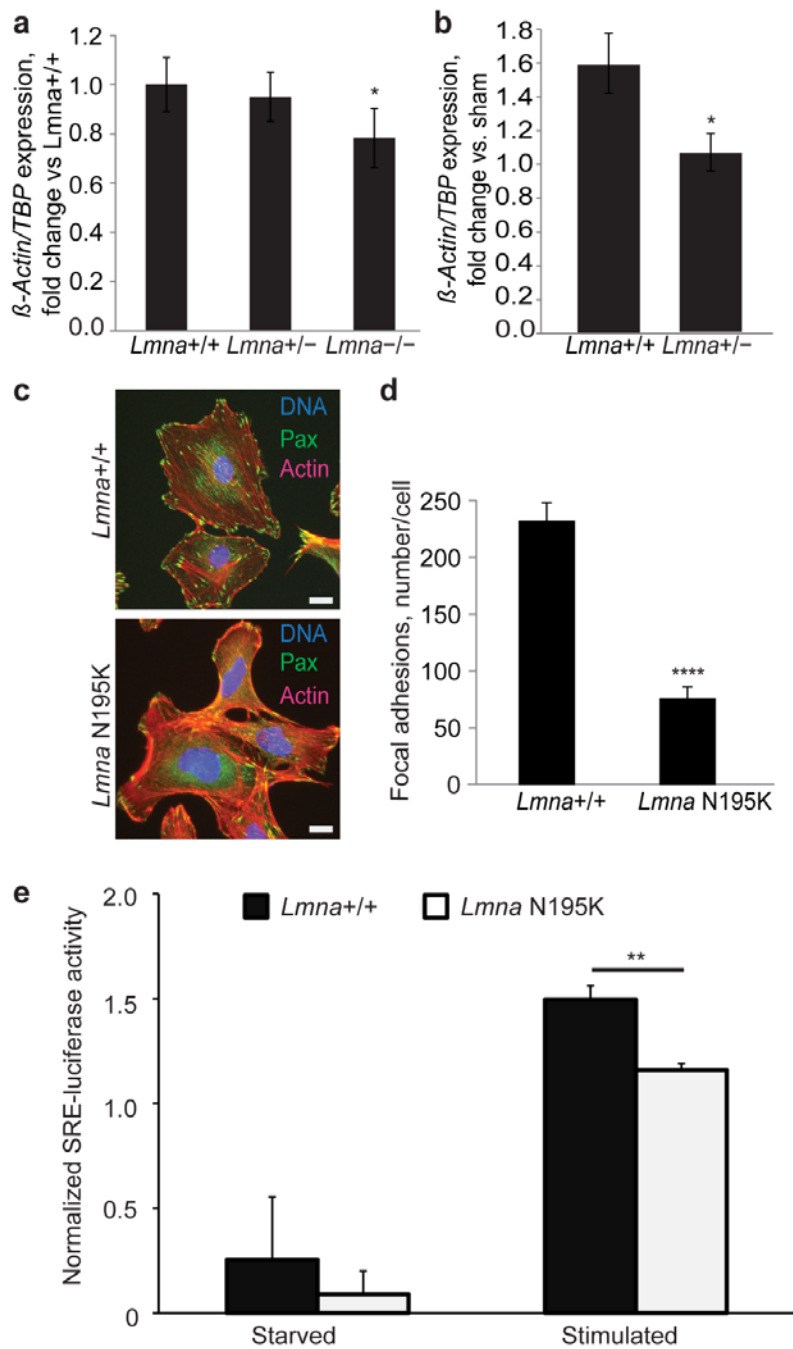

**Supplementary Figure 3. Functional consequences of impaired MKL1 nuclear translocation** (a) Gene expression of  $\beta$ -Actin in  $Lmna^{+/+}$  ( $N = 9$ ),  $Lmna^{+/-}$  ( $N = 11$ ) and  $Lmna^{-/-}$  ( $N = 10$ ) cardiac tissue. Values were normalized to *TBP*. (b) Gene expression of  $\beta$ -Actin in  $Lmna^{+/+}$  ( $N = 5$ ) and  $Lmna^{+/-}$  ( $N = 7$ ) cardiac tissue collected 1 week after transverse aortic constriction (TAC) surgery. Values were normalized to *TBP* and compared to those from sham animals. Statistical significance determined by Student's *t*-test, compared with  $Lmna^{+/+}$  MEFs; \*, indicates  $P \leq 0.05$ . (c) Immunofluorescence staining for F-actin and the focal adhesion protein paxillin in representative wild-type ( $Lmna^{+/+}$ ) and  $Lmna$  N195K MEFs. DNA is shown in blue, actin in red, and paxillin in green. Scale bar, 20  $\mu$ m. (d)  $Lmna$  N195K cells had fewer focal adhesions per cells than cells from wild-type ( $Lmna^{+/+}$ ) littermates. (e) Serum response factor (SRF) promoter activity was lowered in  $Lmna$  N195K compared to  $Lmna^{+/+}$  MEFs. SRF activity was quantified using a Dual-Glo Luciferase assay with serum response element (SRE)-luciferase. Values represent average of six biological replicates from two independent experiments. \*\*, denotes  $P \leq 0.01$  compared with corresponding  $Lmna^{+/+}$  control. Error bars, s.e.m.

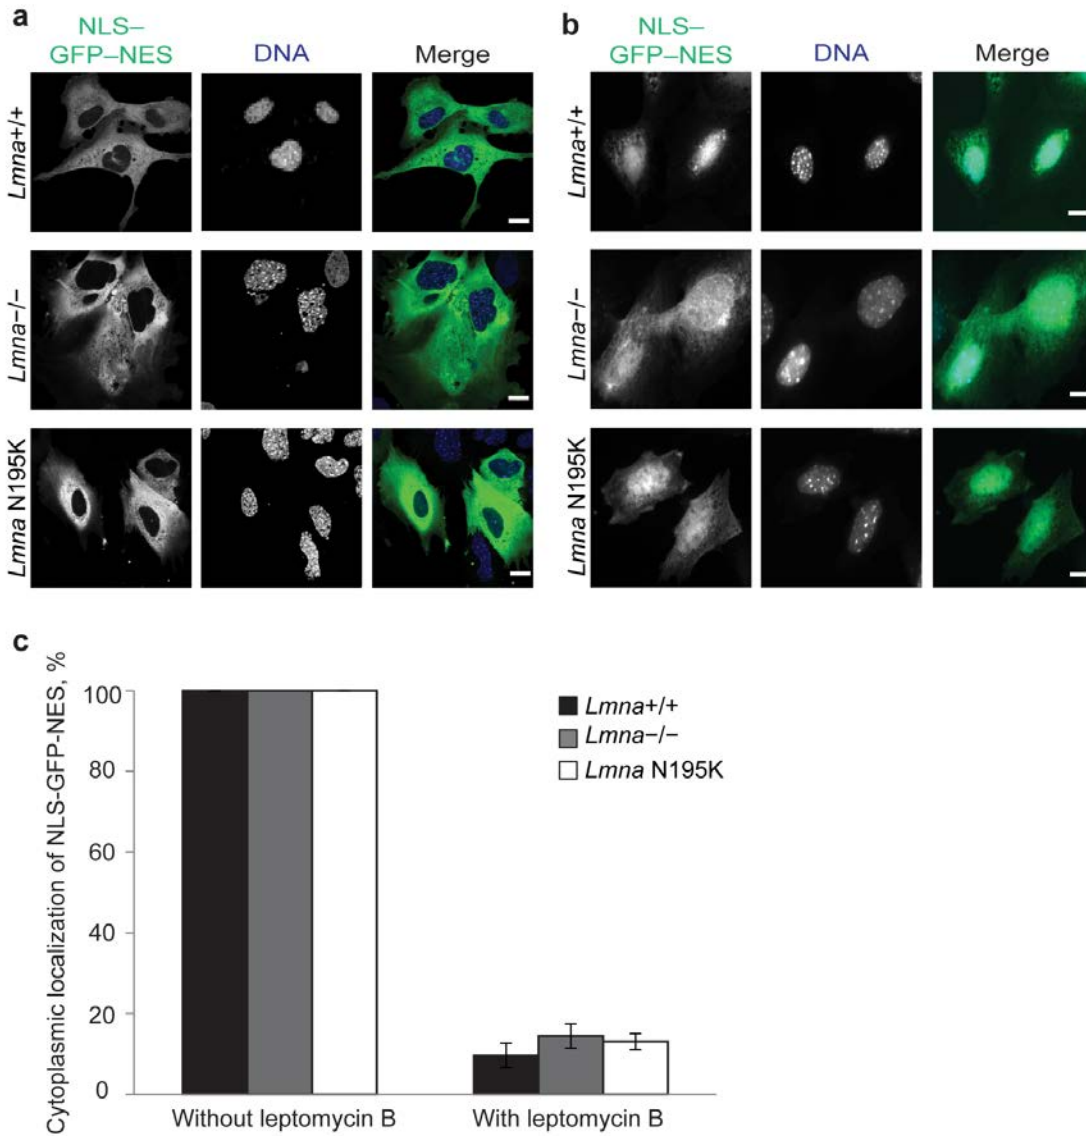

**Supplementary Figure 4. Nuclear transport is generally preserved in the *Lmna*<sup>-/-</sup> and *Lmna* N195K cells.** The NLS-GFP-NES reporter consisting of GFP fused to an NLS and a nuclear export sequence (NES). The SV40-derived NLS is importin  $\alpha/\beta$ -dependent, similar to MKL1. Normally, the dominant NES drives cytoplasmic localization of the NLS-GFP-NES reporter; conversely, blocking nuclear export with leptomycin B results in nuclear accumulation of the reporter construct.<sup>2</sup> (a) Representative images of *Lmna*<sup>+/+</sup>, *Lmna*<sup>-/-</sup> and *Lmna* N195K MEFs expressing the NLS-GFP-NES fusion construct. The NLS-GFP-NES was predominantly localized to the cytoplasm in all cell lines. DNA (Hoechst33342) is shown in blue; NLS-GFP-NES is shown in green. Scale bar, 20  $\mu$ m. (b) *Lmna*<sup>+/+</sup>, *Lmna*<sup>-/-</sup> and *Lmna* N195K MEFs expressing the NLS-GFP-NES construct treated with leptomycin B, a nuclear export inhibitor, resulting in accumulation of the NLS-GFP-NES reporter construct in the nucleus and indicating that general nuclear import is preserved in the *Lmna*<sup>-/-</sup> and *Lmna* N195K cells. DNA is shown in blue; NLS-GFP-NES is shown in green. Scale bar, 10  $\mu$ m. (c) Quantification of cell fractions exhibiting cytoplasmic localization of the reporter construct, NLS-GFP-NES in the absence (left) and presence (right) of leptomycin B showed comparable levels of bulk import and export events. In the absence of leptomycin B, the NLS-GFP-NES showed completely cytoplasmic localization. In the presence of leptomycin B, only 9.7 $\pm$ 3.07% (*Lmna*<sup>+/+</sup>), 14.5 $\pm$ 2.95% (*Lmna*<sup>-/-</sup>) and 13.1 $\pm$ 1.85% (*Lmna* N195K) cells exhibited cytoplasmic localization of this reporter. Data was expressed in percentage of cells with cytoplasmic localization of NLS-GFP-NES and was not significantly different among the 3 groups.  $N \approx 100$  for each cell line. Error bars, s.e.m.

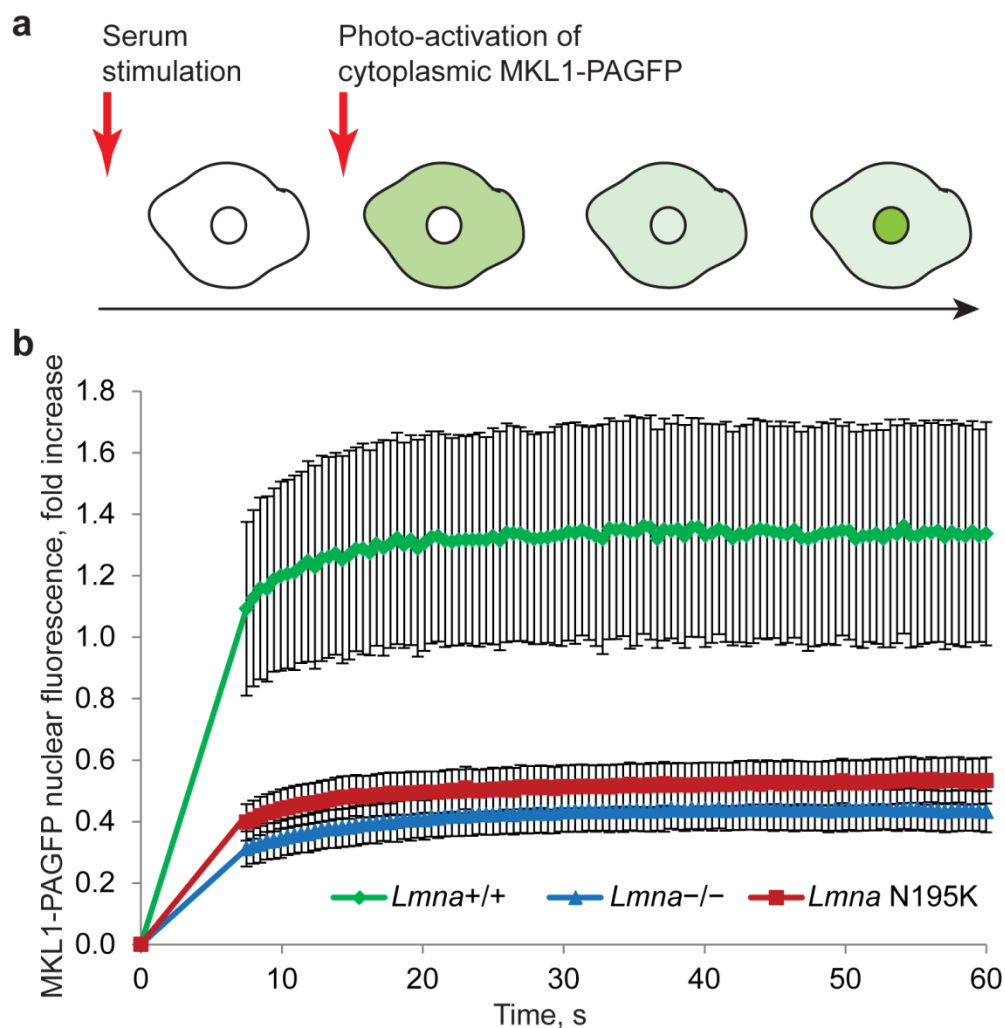

**Supplementary Figure 5. Nuclear import of MKL1 is impaired in *Lmna*<sup>-/-</sup> and *Lmna* N195K cells.** (a) Schematic diagram of experiments with cells expressing photoactivatable MKL1-GFP (MKL1-PAGFP) to measure nuclear import of MKL1. After serum stimulation, MKL1-PAGFP was selectively activated in the cytoplasm. Subsequent translocation of photoactivated MKL1-PAGFP into the nucleus was monitored by time-lapse confocal microscopy to reveal the rate of nuclear import. (b) The photoactivation experiments showed rapid entry and accumulation of activated cytoplasmic MKL1-PAGFP into the nucleus of *Lmna*<sup>+/+</sup> cells; in contrast, this response was significantly weaker in *Lmna*<sup>-/-</sup> and *Lmna* N195K MEFs. Nuclear fluorescence intensity of MKL1-PAGFP was normalized to the initial fluorescence of the cytoplasmic activation area.  $N = 8$  for each cell line. Error bars, s.e.m.

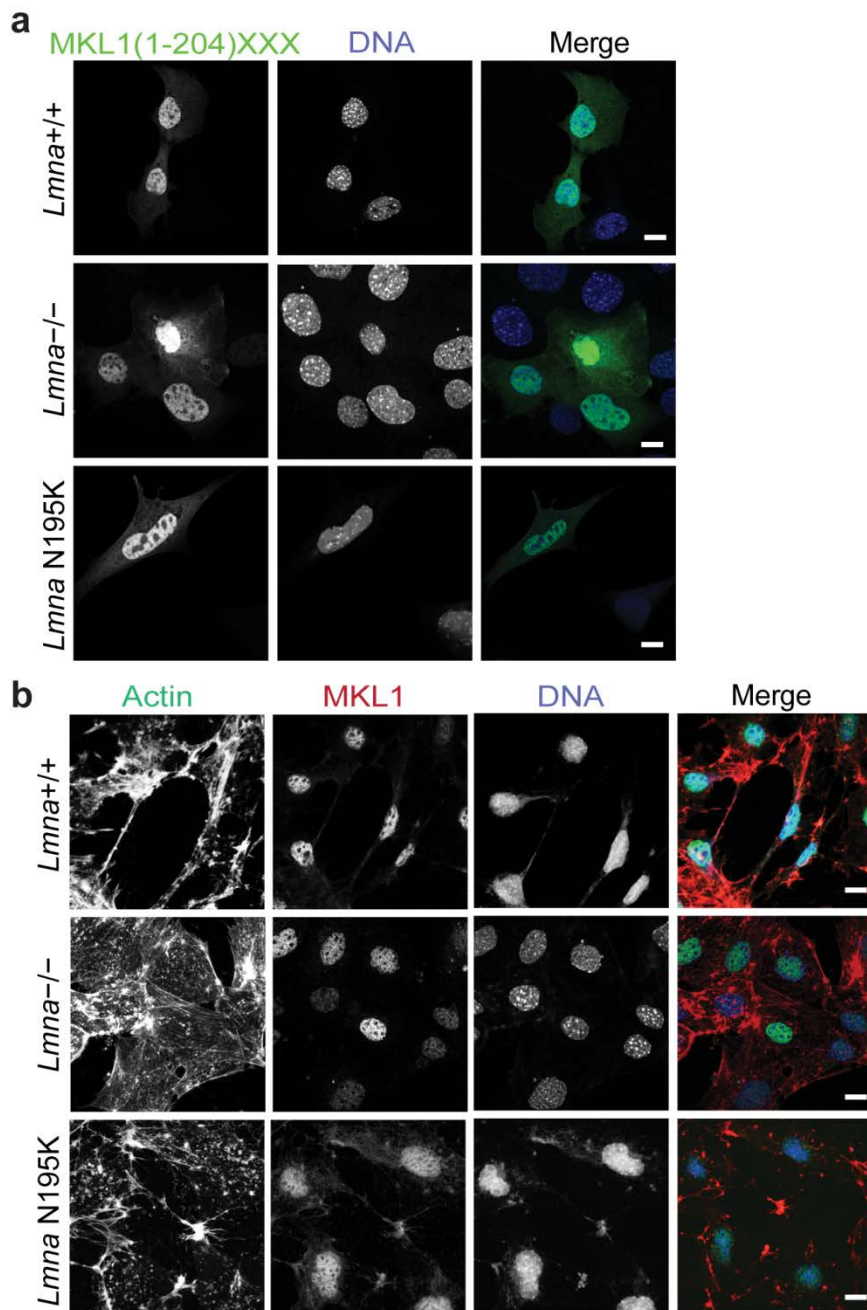

**Supplementary Figure 6. Impaired nuclear translocation of MKL1 is caused by altered actin dynamics in *Lmna*<sup>-/-</sup> and *Lmna* N195K cells.** (a) Fluorescence images of representative *Lmna*<sup>+/+</sup>, *Lmna*<sup>-/-</sup> and *Lmna* N195K MEFs expressing a reporter construct (MKL1(1-204)XXX-2×GFP) similar to the MKL1(1-204)-2×GFP construct, but in which arginine-to-alanine substitution in all three RPEL domains of MKL1 prevent actin binding. MKL1(1-204)XXX-2×GFP localizes to the nucleus even in starved *Lmna*<sup>+/+</sup>, *Lmna*<sup>-/-</sup> and *Lmna* N195K MEFs, indicating that MKL1 can enter the nucleus of *Lmna*<sup>-/-</sup> and *Lmna* N195K cells when decoupled from actin dynamics. DNA is shown in blue; MKL1(1-204)XXX-2×GFP in green. Scale bar, 10 μm. (b) Representative immunofluorescence images of endogenous MKL1 in *Lmna*<sup>+/+</sup>, *Lmna*<sup>-/-</sup> and *Lmna* N195K MEFs treated with cytochalasin D, which disrupts the interaction between MKL1 and G-actin and results in nuclear translocation of MKL1 independent of actin dynamics in all cell lines. Scale bar, 10 μm.

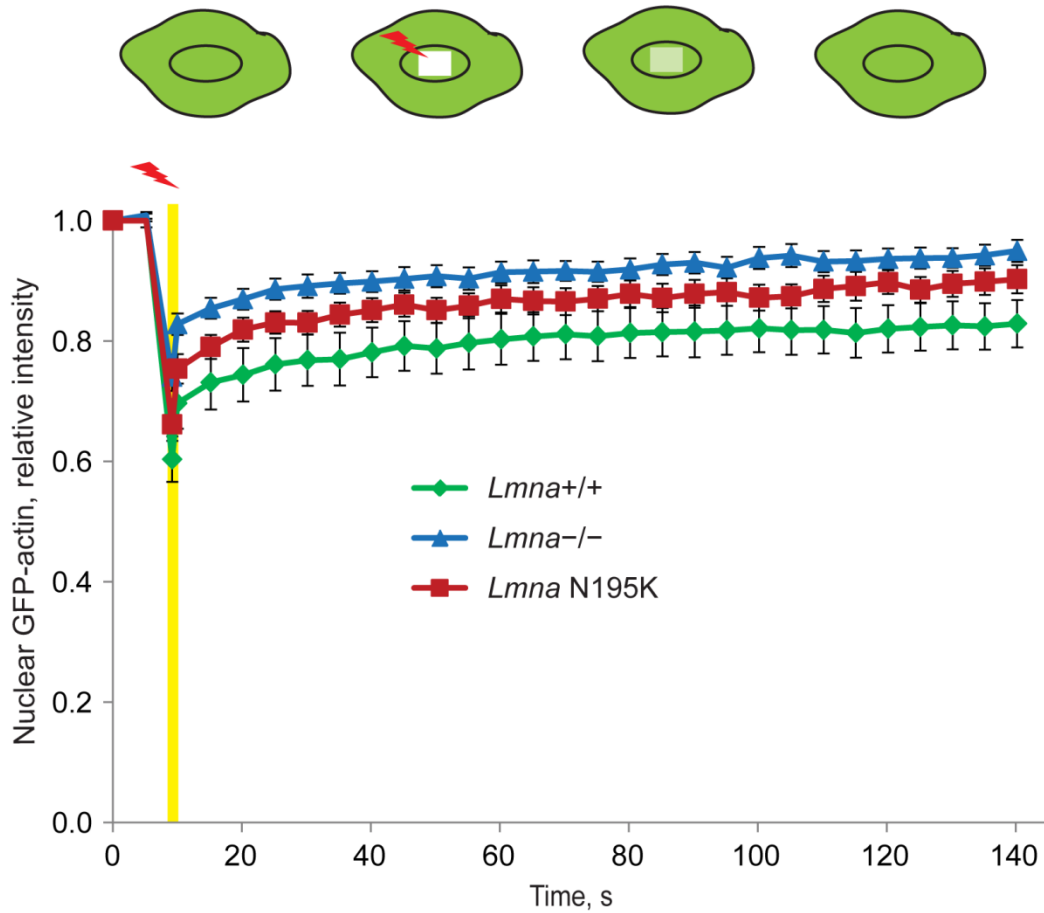

**Supplementary Figure 7. *Lmna* mutant cells show increased nuclear actin mobility.** Fluorescence recovery after photobleaching (FRAP) analysis of nuclear GFP-actin revealed increased actin mobility in *Lmna*<sup>-/-</sup> and *Lmna* N195K cells relative to *Lmna*<sup>+/+</sup> MEFs. *N* = 20 for each cell line. Error bars, s.e.m.



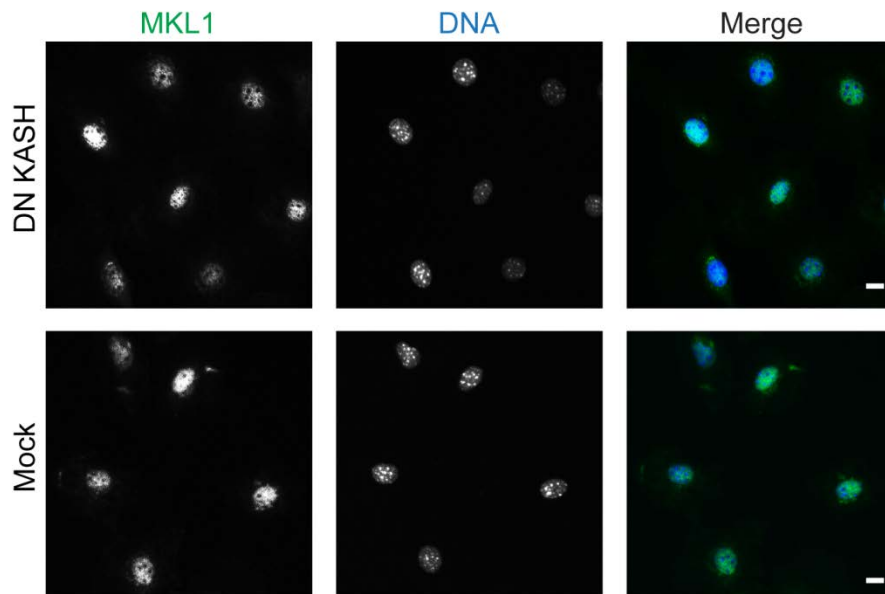

**Supplementary Figure 8. MKL1 translocates normally into the nucleus in LINC complex-disrupted MEFs.** Lamins A/C, together with nesprins and SUN proteins, are components of the LINC (linker of nucleoskeleton and cytoskeleton) complex that serves as a mechanical link between the nucleus and the cytoskeleton.<sup>3</sup> Cells were modified to express a dominant negative nesprin mutant (DN KASH) that displaces endogenous nesprins from the nuclear envelope and thus decouples the nucleus from the cytoskeleton,<sup>4</sup> similar to defects previously described in *Lmna*<sup>-/-</sup> MEFs.<sup>5</sup> Despite the obvious defects in nucleo-cytoskeletal coupling, DN KASH expressing cells had normal nuclear translocation of MKL1, consistent with a recent report that DN KASH modified cells have normal expression of vinculin in response to mechanical stimulation.<sup>4</sup> Shown are representative confocal immunofluorescence images of MKL1 localization in serum-stimulated MEFs expressing either DN-KASH or mock control. DNA is shown in blue. MKL1 is shown in green. Scale bar, 10  $\mu\text{m}$ .

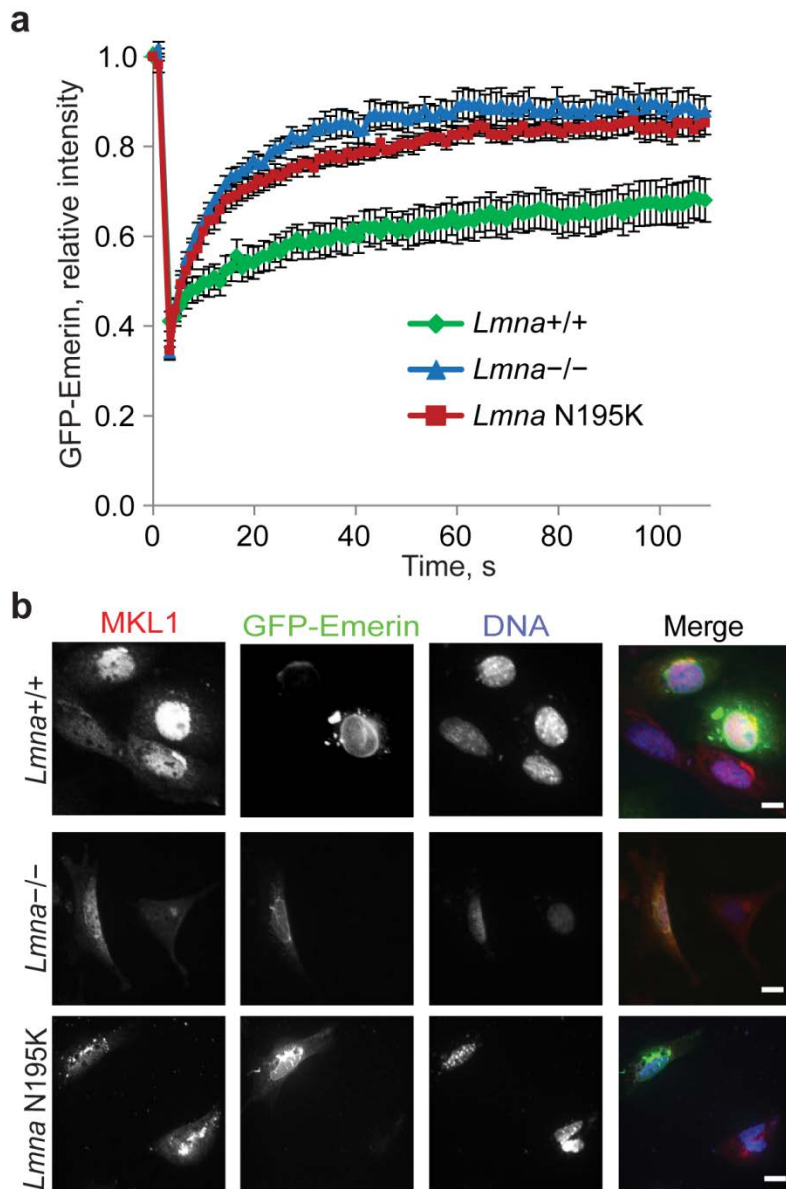

**Supplementary Figure 9. Emerin expression restores MKL1 nuclear translocation in *Lmna*<sup>-/-</sup> and *Lmna* N195K cells.** (a) Fluorescence recovery after photobleaching (FRAP) analysis revealed increased mobility of GFP-emerin at the nuclear envelope in *Lmna*<sup>-/-</sup> and *Lmna* N195K MEFs compared to *Lmna*<sup>+/+</sup> cells.  $N = 10$  for each cell line. Error bars, s.e.m. (b) Representative images of MKL1 localization in cells transfected with GFP-emerin and stimulated with serum. Nuclear localization of MKL1 was restored in *Lmna*<sup>-/-</sup> and *Lmna* N195K cells expressing GFP-emerin. DNA is shown in blue, emerin in green, and MKL1 in red. Scale bar, 10  $\mu$ m.

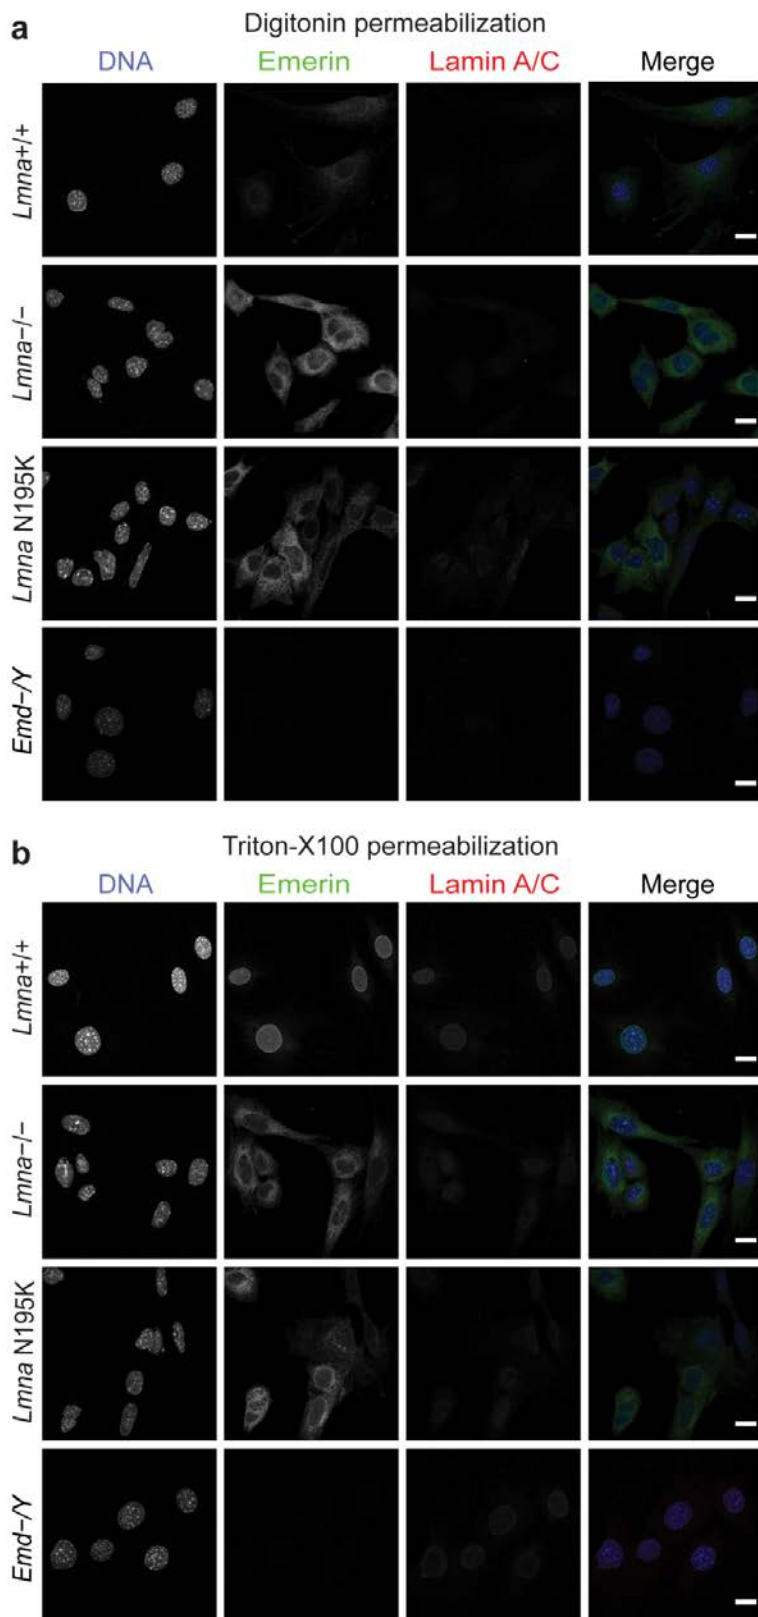

**Supplementary Figure 10. A subset of emerlin is located on the outer nuclear membrane and this fraction is increased in *Lmna* null and mutant cells.** Digitonin-permeabilized cells stained for emerlin (green) and lamin A/C (red) revealed that a fraction of emerlin is localized to the outer nuclear membrane and endoplasmic reticulum in *Lmna*<sup>+/+</sup> MEFs. *Lmna*<sup>-/-</sup> and *Lmna* N195K cells displayed increased mislocalization of emerlin in the outer nuclear membrane and endoplasmic reticulum. DNA is labeled in blue. Scale bar, 10  $\mu$ m.

## Descriptions for Supplementary Videos

**Supplementary Movie 1. Nuclear translocation of MKL1-GFP in *Lmna*<sup>+/+</sup> MEFs.** This movie shows an *Lmna*<sup>+/+</sup> mouse embryonic fibroblast expressing MKL1-GFP imaged before (frame 1) and immediately after serum stimulation (frames 2 and onwards). This time lapse covers a period of about 20 minutes. MKL1-GFP accumulated in the nucleus during the course of the movie. (QuickTime, 168 kb)

**Supplementary Movie 2. Nuclear translocation of MKL1-GFP in *Lmna*<sup>-/-</sup> MEFs.** This movie shows an *Lmna*<sup>-/-</sup> mouse embryonic fibroblast expressing MKL1-GFP imaged before (frame 1) and immediately after serum stimulation (frames 2 and onwards). This time lapse covers a period of about 20 minutes. Nuclear accumulation of MKL1-GFP is not evident during the course of the movie. (QuickTime, 428 kb)

**Supplementary Movie 3. Nuclear translocation of MKL1-GFP in *Lmna* N195K MEFs.** This movie shows an *Lmna* N195K mouse embryonic fibroblast expressing MKL1-GFP imaged before (frame 1) and immediately after serum stimulation (frames 2 and onwards). This time lapse covers a period of about 20 minutes. Nuclear accumulation of MKL1-GFP is not evident during the course of the movie. (QuickTime, 238 kb)

**Supplementary Movie 4. Nuclear translocation of MKL1(1-204)-2×GFP in *Lmna*<sup>+/+</sup> MEFs.** This movie shows an *Lmna*<sup>+/+</sup> mouse embryonic fibroblast expressing MKL1(1-204)-2×GFP imaged before (frame 1) and immediately after serum stimulation (frames 2 and onwards). This time lapse covers a period of about 15 minutes. MKL1(1-204)-2×GFP accumulated rapidly in the nucleus during the course of the movie. (QuickTime, 178 kb)

**Supplementary Movie 5. Nuclear translocation of MKL1(1-204)-2×GFP in *Lmna*<sup>-/-</sup> MEFs.** This movie shows an *Lmna*<sup>-/-</sup> mouse embryonic fibroblast expressing MKL1(1-204)-2×GFP imaged before (frame 1) and immediately after serum stimulation (frames 2 and onwards). This time lapse covers a period of about 15 minutes. Little or very low levels of MKL1(1-204)-2×GFP accumulated in the nucleus during the course of the movie. (QuickTime, 182 kb)

**Supplementary Movie 6. Nuclear translocation of MKL1(1-204)-2×GFP in *Lmna* N195K MEFs.** This movie shows an *Lmna* N195K mouse embryonic fibroblast expressing MKL1(1-204)-2×GFP imaged before (frame 1) and immediately after serum stimulation (frames 2 and onwards). This time lapse covers a period of about 15 minutes. Little or very low levels of MKL1(1-204)-2×GFP accumulated in the nucleus during the course of the movie. (QuickTime, 191 kb)

**Supplementary Movie 7. Photoactivation and nuclear translocation of MKL1-PAGFP in *Lmna*<sup>+/+</sup> MEFs.** This movie shows an *Lmna*<sup>+/+</sup> mouse embryonic fibroblast (outlined in red) expressing MKL1-PAGFP after serum stimulation. Cytoplasmic MKL1-PAGFP was stimulated with a 405 nm laser and entry of the activated pool of MKL1-PAGFP is monitored for 1 minute. Frame 1 was captured before photoactivation. MKL1-PAGFP accumulated in the nucleus during the course of the movie. (QuickTime, 528 kb)

**Supplementary Movie 8. Photoactivation and nuclear translocation of MKL1-PAGFP in *Lmna*<sup>-/-</sup> MEFs.** This movie shows an *Lmna*<sup>-/-</sup> mouse embryonic fibroblast (outlined in red) expressing MKL1-PAGFP after serum stimulation. Cytoplasmic MKL1-PAGFP was stimulated with a 405 nm laser and entry of the activated pool of MKL1-PAGFP is monitored for 1 minute. Frame 1 was captured before photoactivation. MKL1-PAGFP did not accumulate in the nucleus during the course of the movie. (QuickTime, 387 kb)

**Supplementary Movie 9. Photoactivation and nuclear translocation of MKL1-PAGFP in *Lmna* N195K MEFs.** This movie shows an *Lmna* N195K mouse embryonic fibroblast (outlined in red) expressing MKL1-PAGFP after serum stimulation. Cytoplasmic MKL1-PAGFP was stimulated with a 405 nm laser and entry of

the activated pool of MKL1-PAGFP is monitored for 1 minute. Frame 1 was captured before photoactivation. MKL1-PAGFP did not accumulate in the nucleus during the course of the movie. (QuickTime, 490 kb)

## References for Supplementary Materials

- <sup>1</sup> Kelley, J. B. et al., The defective nuclear lamina in Hutchinson-gilford progeria syndrome disrupts the nucleocytoplasmic Ran gradient and inhibits nuclear localization of Ubc9. *Mol Cell Biol* **31** (16), 3378 (2011).
- <sup>2</sup> Kudo, N. et al., Leptomycin B inhibition of signal-mediated nuclear export by direct binding to CRM1. *Exp Cell Res* **242** (2), 540 (1998).
- <sup>3</sup> Wilson, K. L. and Foisner, R., Lamin-binding Proteins. *Cold Spring Harb Perspect Biol* **2** (4), a000554 (2010).
- <sup>4</sup> Lombardi, M. L. and Lammerding, J., Keeping the LINC: the importance of nucleocytoskeletal coupling in intracellular force transmission and cellular function. *Biochem Soc Trans* **39** (6), 1729 (2011).
- <sup>5</sup> Hale, C. M. et al., Dysfunctional connections between the nucleus and the actin and microtubule networks in laminopathic models. *Biophys J* **95** (11), 5462 (2008).
